# Supplementary material
Source: HighWire-hosted journal article supplement (https://rmdopen.bmj.com/content/9/1/e002982)
Supplement: inline-supplementary-material-1 [file inline-supplementary-material-1.pdf]

**Supplemental Figure 1****Timeline of treatment**

Clinical Case: A rare side effect of methotrexate therapy – drug induced osteopathy with multiple fractures of the lower limb

| 2015                         |         |          |       |       |     |      |                             |        |           |         |          |          |
|------------------------------|---------|----------|-------|-------|-----|------|-----------------------------|--------|-----------|---------|----------|----------|
|                              | January | February | March | April | May | June | July                        | August | September | October | November | December |
| Therapy rheumatoid arthritis |         |          |       |       |     |      | intermittently prednisolone |        |           |         |          |          |
| Therapy osteoporosis         |         |          |       |       |     |      |                             |        |           |         |          |          |

| 2016                         |                             |          |       |       |     |      |      |        |           |         |          |          |
|------------------------------|-----------------------------|----------|-------|-------|-----|------|------|--------|-----------|---------|----------|----------|
|                              | January                     | February | March | April | May | June | July | August | September | October | November | December |
| Therapy rheumatoid arthritis | intermittently prednisolone |          |       |       |     |      |      |        |           |         |          |          |
| Therapy osteoporosis         |                             |          |       |       |     |      |      |        |           |         |          |          |

| 2017                         |                             |          |       |       |     |      |      |        |           |         |          |          |
|------------------------------|-----------------------------|----------|-------|-------|-----|------|------|--------|-----------|---------|----------|----------|
|                              | January                     | February | March | April | May | June | July | August | September | October | November | December |
| Therapy rheumatoid arthritis | intermittently prednisolone |          |       |       |     |      |      |        |           |         |          |          |
| Therapy osteoporosis         |                             |          |       |       |     |      |      |        |           |         |          |          |

| 2018                         |                             |          |       |       |     |      |      |        |           |         |          |          |
|------------------------------|-----------------------------|----------|-------|-------|-----|------|------|--------|-----------|---------|----------|----------|
|                              | January                     | February | March | April | May | June | July | August | September | October | November | December |
| Therapy rheumatoid arthritis | intermittently prednisolone |          |       |       |     |      |      |        |           |         |          |          |
| Therapy osteoporosis         |                             |          |       |       |     |      |      |        |           |         |          |          |

| 2019 |  |  |  |  |  |  |  |  |  |  |  |  |
|------|--|--|--|--|--|--|--|--|--|--|--|--|
|------|--|--|--|--|--|--|--|--|--|--|--|--|

|                              | January                     | February | March | April | May | June | July | August | September | October | November     | December |
|------------------------------|-----------------------------|----------|-------|-------|-----|------|------|--------|-----------|---------|--------------|----------|
| Therapy rheumatoid arthritis | intermittently prednisolone |          |       |       |     |      |      |        |           |         | methotrexate |          |
| Therapy osteoporosis         |                             |          |       |       |     |      |      |        |           |         | alendronate  |          |

| 2020                         |              |          |       |       |     |           |      |        |             |         |          |          |
|------------------------------|--------------|----------|-------|-------|-----|-----------|------|--------|-------------|---------|----------|----------|
|                              | January      | February | March | April | May | June      | July | August | September   | October | November | December |
| Therapy rheumatoid arthritis | methotrexate |          |       |       |     |           |      |        |             |         |          |          |
| Therapy osteoporosis         | alendronate  |          |       |       |     | denosumab |      |        | romosozumab |         |          |          |

| 2021                         |              |          |       |       |     |      |      |        |           |           |          |          |
|------------------------------|--------------|----------|-------|-------|-----|------|------|--------|-----------|-----------|----------|----------|
|                              | January      | February | March | April | May | June | July | August | September | October   | November | December |
| Therapy rheumatoid arthritis | methotrexate |          |       |       |     |      |      |        |           |           |          |          |
| Therapy osteoporosis         | romosozumab  |          |       |       |     |      |      |        |           | denosumab |          |          |

| 2022                         |              |          |       |       |     |      |      |        |           |             |          |          |
|------------------------------|--------------|----------|-------|-------|-----|------|------|--------|-----------|-------------|----------|----------|
|                              | January      | February | March | April | May | June | July | August | September | October     | November | December |
| Therapy rheumatoid arthritis | methotrexate |          |       |       |     |      |      |        |           | tocilizumab |          |          |
| Therapy osteoporosis         | denosumab    |          |       |       |     |      |      |        |           |             |          |          |
