# Supplementary material
Source: HighWire-hosted journal article supplement (https://rmdopen.bmj.com/content/9/1/e002982)
Supplement: inline-supplementary-material-2 [file inline-supplementary-material-2.pdf]

## Supplemental Figure 2

MRI of the right foot at the time of the occurrence of the first fracture

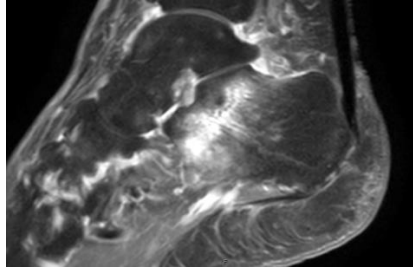

(T1-weighted imaging)

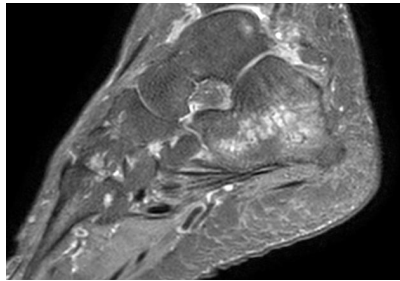

(T2-weighted imaging)
